# Supplementary material for: Histotripsy for the Treatment of Cholangiocarcinoma Liver Tumors: In Vivo Feasibility and Ex Vivo Dosimetry Study
Source: PubMed Central journal article supplement (PMC9297335; doi:10.1109/tuffc.2021.3073563), 2021-08-27

# Supplemental Figure S1

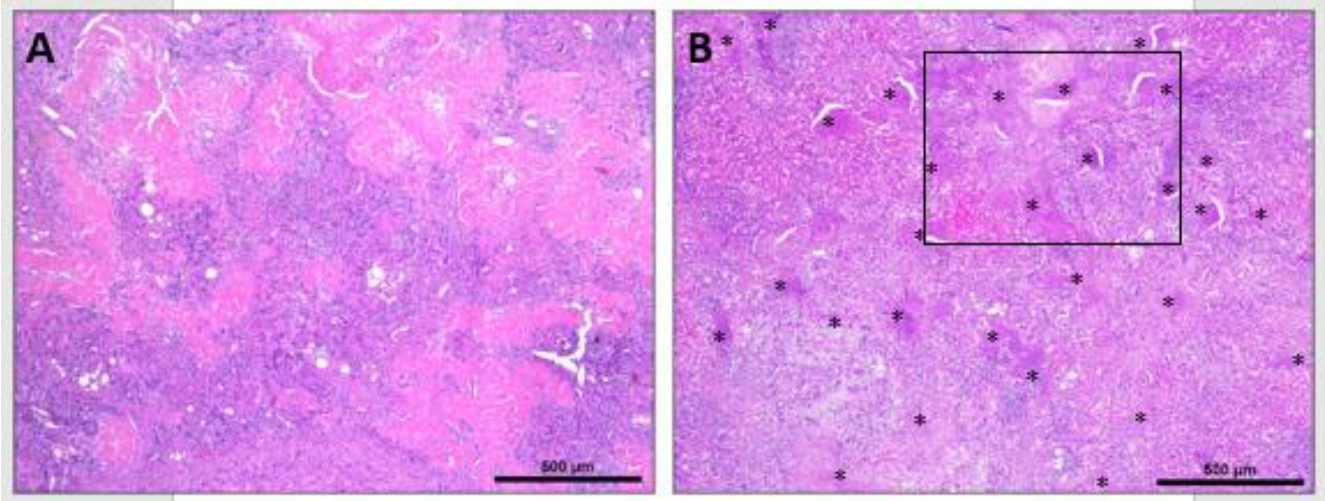

Supplement: NIHMS1821487-supplement-Supplementary_Material.pdf [file NIHMS1821487-supplement-Supplementary_Material.pdf]
